# Supplementary material for: Atmospheric oxidation of 2-fluoropropene (CH3CFCH2) with Cl atom and aerial degradation of its product radicals by computational study
Source: Royal Society of Chemistry journal article supplement (doi:10.1039/c9nj05437e), 2020-01-01
Supplement: c9nj05437e1.pdf [file c9nj05437e1.pdf]

**Atmospheric Oxidation of 2-fluoropropene (CH<sub>3</sub>CF=CH<sub>2</sub>) with Cl Atom and Aerial  
Degradation of its Product Radicals from Computational Study**

Nand Krishor Gour, Ramesh Chandra Deka and Subrata Paul\*

Department of Chemical Sciences, Tezpur University, Tezpur, Assam -784028, India

\*Corresponding Authors: spdsk@tezu.ernet.in

Telephone: +91-7002093921, FAX: +91-3712-267005

**Table S1:** The Zero-point corrected Total energy (E<sub>0</sub>), Enthalpy (H) and Gibbs free energy (G) of all species at MP2/6-31+G(d,p) level of theory. All values are in Hartree.

| species                            | E <sub>0</sub> | H           | G           |
|------------------------------------|----------------|-------------|-------------|
| CH <sub>3</sub> CF=CH <sub>2</sub> | -216.4680828   | -216.458211 | -216.490484 |
| Cl                                 | -459.5540907   | -459.55173  | -459.569768 |
| IM_add                             | -676.0294841   | -676.017862 | -676.055914 |
| TS1                                | -676.0067416   | -675.995797 | -676.034258 |
| TS2a                               | -675.9854581   | -675.974123 | -676.013453 |
| TS2b                               | -675.9861608   | -675.974856 | -676.013896 |
| TS3                                | -676.023646    | -676.012668 | -676.049196 |
| TS4                                | -676.0263633   | -676.015118 | -676.052811 |
| P1                                 | -215.8253588   | -215.816661 | -215.848709 |
| P2                                 | -215.8773544   | -215.868363 | -215.900969 |
| P3                                 | -676.0481208   | -676.036805 | -676.073641 |
| P4                                 | -676.0454971   | -676.034061 | -676.071845 |
| HCl                                | -460.2009457   | -460.197223 | -460.218391 |

**Table S2:** Cartesian coordinates (in Å) of all species at MP2/6-31+G(d,p) level of theory.

| Species                            | Cartesian Coordinate |              |              |              |
|------------------------------------|----------------------|--------------|--------------|--------------|
|                                    | At. No.              | X            | Y            | Z            |
| CH <sub>3</sub> CF=CH <sub>2</sub> | 6                    | 1.345916000  | -0.428778000 | -0.000017000 |
|                                    | 6                    | -0.093973000 | -0.055816000 | -0.000002000 |
|                                    | 1                    | 1.838787000  | -0.020342000 | -0.881980000 |
|                                    | 1                    | 1.838791000  | -0.020394000 | 0.881968000  |
|                                    | 1                    | 1.454137000  | -1.510964000 | -0.000050000 |
|                                    | 6                    | -1.175377000 | -0.835902000 | -0.000042000 |
|                                    | 1                    | -2.166326000 | -0.409836000 | -0.000026000 |
|                                    | 1                    | -1.058941000 | -1.907743000 | -0.000092000 |
|                                    | 9                    | -0.262872000 | 1.310250000  | 0.000061000  |
| TS1                                | 6                    | -0.213253000 | -0.255112000 | 1.070279000  |
|                                    | 6                    | -1.272473000 | -0.044456000 | 0.103228000  |
|                                    | 1                    | 0.893733000  | -0.119267000 | 0.428296000  |
|                                    | 1                    | -0.113337000 | 0.523771000  | 1.819478000  |
|                                    | 1                    | -0.146733000 | -1.267251000 | 1.452798000  |
|                                    | 6                    | -1.981388000 | -0.968081000 | -0.518212000 |
|                                    | 1                    | -2.746844000 | -0.698394000 | -1.228481000 |
|                                    | 1                    | -1.797802000 | -2.009882000 | -0.311923000 |
|                                    | 9                    | -1.492034000 | 1.273113000  | -0.171513000 |
|                                    | 17                   | 2.243646000  | -0.016535000 | -0.267549000 |
| TS2a                               | 6                    | -2.685633000 | -0.303385000 | 0.000340000  |
|                                    | 6                    | -1.212345000 | -0.068465000 | 0.000171000  |
|                                    | 1                    | -3.120032000 | 0.159888000  | 0.885115000  |
|                                    | 1                    | -3.120254000 | 0.160018000  | -0.884259000 |
|                                    | 1                    | -2.907092000 | -1.367043000 | 0.000289000  |
|                                    | 6                    | -0.273855000 | -0.957872000 | -0.000016000 |
|                                    | 1                    | 1.142055000  | -0.422090000 | -0.000164000 |
|                                    | 1                    | -0.248565000 | -2.032467000 | -0.000097000 |

|                   |    |              |              |              |
|-------------------|----|--------------|--------------|--------------|
|                   | 9  | -0.911822000 | 1.258721000  | 0.000232000  |
|                   | 17 | 2.440664000  | 0.008914000  | -0.000349000 |
| TS2               | 6  | 1.098745000  | 1.376199000  | 0.000038000  |
|                   | 6  | 1.218793000  | -0.104976000 | 0.000017000  |
|                   | 1  | 1.595789000  | 1.774062000  | 0.883538000  |
|                   | 1  | 1.595800000  | 1.774089000  | -0.883444000 |
|                   | 1  | 0.055604000  | 1.676828000  | 0.000036000  |
|                   | 6  | 0.295824000  | -1.010478000 | 0.000005000  |
|                   | 1  | 0.240780000  | -2.085007000 | 0.000004000  |
|                   | 1  | -1.126133000 | -0.474498000 | -0.000038000 |
|                   | 9  | 2.532887000  | -0.505680000 | 0.000014000  |
|                   | 17 | -2.402235000 | 0.018893000  | -0.000034000 |
| IM <sub>add</sub> | 6  | -1.354613000 | 1.243076000  | 0.159430000  |
|                   | 6  | -0.853413000 | -0.153089000 | 0.152022000  |
|                   | 1  | -1.015980000 | 1.758661000  | -0.736992000 |
|                   | 1  | -2.445125000 | 1.233181000  | 0.164090000  |
|                   | 1  | -0.990475000 | 1.769009000  | 1.037718000  |
|                   | 6  | -0.226428000 | -0.836944000 | 1.141372000  |
|                   | 1  | 0.012029000  | -1.881561000 | 1.018400000  |
|                   | 1  | 0.005224000  | -0.337115000 | 2.067490000  |
|                   | 9  | -1.187475000 | -0.827281000 | -0.973852000 |
|                   | 17 | 1.748725000  | 0.199123000  | -0.206057000 |
| TS3               | 6  | 1.179448000  | 1.236254000  | -0.350915000 |
|                   | 6  | 0.699977000  | -0.145058000 | -0.078636000 |
|                   | 1  | 0.855244000  | 1.902041000  | 0.443195000  |
|                   | 1  | 2.269886000  | 1.215927000  | -0.379257000 |
|                   | 1  | 0.793165000  | 1.588273000  | -1.302675000 |
|                   | 6  | 0.393119000  | -1.104944000 | -0.999058000 |
|                   | 1  | 0.233353000  | -2.123661000 | -0.686553000 |
|                   | 1  | 0.219713000  | -0.821916000 | -2.023102000 |
|                   | 9  | 1.001315000  | -0.564882000 | 1.166089000  |

|     |    |              |              |              |
|-----|----|--------------|--------------|--------------|
|     | 17 | -1.589321000 | 0.200338000  | 0.119132000  |
| TS4 | 6  | -1.507036000 | 1.199465000  | -0.063529000 |
|     | 6  | -0.909492000 | -0.124008000 | 0.215296000  |
|     | 1  | -2.592956000 | 1.128773000  | -0.002657000 |
|     | 1  | -1.141448000 | 1.937626000  | 0.643546000  |
|     | 1  | -1.238172000 | 1.502253000  | -1.075289000 |
|     | 6  | 0.015127000  | -0.451139000 | 1.138181000  |
|     | 1  | 0.301761000  | -1.482148000 | 1.269023000  |
|     | 1  | 0.266569000  | 0.266604000  | 1.900528000  |
|     | 9  | -1.327208000 | -1.077957000 | -0.636086000 |
|     | 17 | 1.809266000  | 0.153094000  | -0.279415000 |
| P1  | 6  | 1.233302000  | 0.658691000  | -0.000024000 |
|     | 6  | 0.000000000  | 0.057266000  | -0.000002000 |
|     | 1  | 2.134482000  | 0.069047000  | -0.000022000 |
|     | 1  | 1.300868000  | 1.733860000  | -0.000057000 |
|     | 6  | -1.233305000 | 0.658685000  | 0.000018000  |
|     | 1  | -2.134483000 | 0.069039000  | 0.000002000  |
|     | 1  | -1.300878000 | 1.733855000  | 0.000025000  |
|     | 9  | 0.000003000  | -1.317072000 | 0.000012000  |
| P2  | 6  | -1.358253000 | -0.281051000 | -0.000023000 |
|     | 6  | 0.124716000  | -0.122565000 | -0.000017000 |
|     | 1  | -1.777144000 | 0.203311000  | 0.885956000  |
|     | 1  | -1.777161000 | 0.203543000  | -0.885868000 |
|     | 1  | -1.627387000 | -1.337081000 | -0.000158000 |
|     | 6  | 1.024418000  | -1.044139000 | -0.000146000 |
|     | 1  | 2.093123000  | -1.164049000 | -0.000172000 |
|     | 9  | 0.482588000  | 1.197867000  | 0.000152000  |
|     | P3 | 6            | 0.985996000  | 1.262807000  |
| 6   |    | 0.375585000  | -0.055559000 | -0.005183000 |
| 1   |    | 0.615310000  | 2.055465000  | 0.228043000  |
| 1   |    | 2.068057000  | 1.188541000  | -0.319351000 |

|                                                        |    |              |              |              |
|--------------------------------------------------------|----|--------------|--------------|--------------|
|                                                        | 1  | 0.730453000  | 1.489144000  | -1.450249000 |
|                                                        | 6  | 0.796465000  | -1.224926000 | -0.799284000 |
|                                                        | 1  | 0.745683000  | -2.202152000 | -0.347431000 |
|                                                        | 1  | 0.884577000  | -1.129066000 | -1.869420000 |
|                                                        | 9  | 0.703756000  | -0.287097000 | 1.335447000  |
|                                                        | 17 | -1.430950000 | 0.075765000  | -0.054778000 |
| P4                                                     | 6  | -1.576740000 | 1.140835000  | -0.133592000 |
|                                                        | 6  | -0.957748000 | -0.118060000 | 0.345898000  |
|                                                        | 1  | -1.172414000 | 1.422831000  | -1.110632000 |
|                                                        | 1  | -2.653667000 | 1.016333000  | -0.232438000 |
|                                                        | 1  | -1.372962000 | 1.947278000  | 0.568484000  |
|                                                        | 6  | 0.394110000  | -0.211291000 | 0.918315000  |
|                                                        | 1  | 0.585353000  | -1.213114000 | 1.291613000  |
|                                                        | 1  | 0.519254000  | 0.520129000  | 1.711911000  |
|                                                        | 9  | -1.298744000 | -1.211118000 | -0.407733000 |
|                                                        | 17 | 1.683847000  | 0.137512000  | -0.314298000 |
| HCl                                                    | 17 | 0.000000000  | 0.000000000  | 0.070556000  |
|                                                        | 1  | 0.000000000  | 0.000000000  | -1.199459000 |
| CH <sub>3</sub> CFCICH <sub>2</sub> (OO <sup>•</sup> ) | 6  | -0.527004000 | 1.455567000  | -0.852917000 |
|                                                        | 6  | -0.486108000 | 0.256634000  | 0.060791000  |
|                                                        | 1  | -1.431167000 | 2.025751000  | -0.653915000 |
|                                                        | 1  | 0.345195000  | 2.077105000  | -0.659915000 |
|                                                        | 1  | -0.524064000 | 1.137342000  | -1.893689000 |
|                                                        | 6  | 0.719366000  | -0.646574000 | -0.103766000 |
|                                                        | 1  | 0.734457000  | -1.411156000 | 0.669524000  |
|                                                        | 1  | 0.749169000  | -1.090404000 | -1.096449000 |
|                                                        | 9  | -0.491247000 | 0.709445000  | 1.379944000  |
|                                                        | 17 | -1.929897000 | -0.765533000 | -0.159400000 |
|                                                        | 8  | 1.898848000  | 0.196692000  | 0.054689000  |
|                                                        | 8  | 2.990947000  | -0.509610000 | -0.142176000 |
|                                                        | 6  | 0.192302000  | 1.466718000  | -0.708625000 |

|                                                       |             |              |              |              |
|-------------------------------------------------------|-------------|--------------|--------------|--------------|
| CH <sub>3</sub> CFCICH <sub>2</sub> (O <sup>•</sup> ) | 6           | -0.013574000 | 0.192514000  | 0.071482000  |
|                                                       | 1           | -0.553227000 | 2.197777000  | -0.405175000 |
|                                                       | 1           | 1.188402000  | 1.851776000  | -0.498587000 |
|                                                       | 1           | 0.097510000  | 1.274516000  | -1.775428000 |
|                                                       | 6           | 0.957455000  | -0.944024000 | -0.277614000 |
|                                                       | 1           | 0.775928000  | -1.761527000 | 0.423215000  |
|                                                       | 1           | 0.759321000  | -1.256042000 | -1.305972000 |
|                                                       | 9           | 0.137190000  | 0.476412000  | 1.426193000  |
|                                                       | 17          | -1.666606000 | -0.433563000 | -0.155907000 |
|                                                       | 8           | 2.251569000  | -0.439362000 | -0.141853000 |
| TS5                                                   | 6           | 0.111153000  | 1.461945000  | -0.806581000 |
|                                                       | 6           | -0.170281000 | 0.310651000  | 0.097423000  |
|                                                       | 1           | -0.653659000 | 2.225523000  | -0.656303000 |
|                                                       | 1           | 1.092537000  | 1.856953000  | -0.560076000 |
|                                                       | 1           | 0.097221000  | 1.136918000  | -1.843716000 |
|                                                       | 6           | 1.292324000  | -1.021376000 | -0.187560000 |
|                                                       | 1           | 0.923799000  | -1.635788000 | 0.648748000  |
|                                                       | 1           | 0.905917000  | -1.318287000 | -1.176662000 |
|                                                       | 9           | -0.043130000 | 0.623568000  | 1.407479000  |
|                                                       | 17          | -1.639200000 | -0.568052000 | -0.178925000 |
| 8                                                     | 2.311197000 | -0.340983000 | -0.082158000 |              |
| CH <sub>3</sub> C <sup>•</sup> FCI                    | 6           | -1.339692000 | -0.988853000 | 0.051220000  |
|                                                       | 6           | -0.372333000 | 0.083408000  | -0.303339000 |
|                                                       | 1           | -1.415858000 | -1.096289000 | 1.136720000  |
|                                                       | 1           | -2.318611000 | -0.727078000 | -0.344974000 |
|                                                       | 1           | -1.018008000 | -1.935413000 | -0.374898000 |
|                                                       | 9           | -0.782872000 | 1.329585000  | 0.067311000  |
|                                                       | 17          | 1.298263000  | -0.163224000 | 0.028828000  |
| HCHO                                                  | 6           | 0.539880000  | 0.000000000  | -0.000015000 |
|                                                       | 1           | 1.117703000  | -0.934258000 | 0.000030000  |
|                                                       | 1           | 1.117702000  | 0.934258000  | 0.000030000  |

|                           |    |              |              |              |
|---------------------------|----|--------------|--------------|--------------|
|                           | 8  | -0.684335000 | 0.000000000  | 0.000004000  |
| CH <sub>3</sub> CFCI(OO•) | 6  | 0.916143000  | -1.501600000 | -0.553466000 |
|                           | 6  | 0.136413000  | -0.371694000 | 0.056203000  |
|                           | 1  | 1.874809000  | -1.579483000 | -0.047883000 |
|                           | 1  | 0.351788000  | -2.421874000 | -0.417929000 |
|                           | 1  | 1.074004000  | -1.313936000 | -1.612143000 |
|                           | 9  | -0.112348000 | -0.611530000 | 1.381898000  |
|                           | 17 | 0.941245000  | 1.188356000  | -0.079930000 |
|                           | 8  | -1.134125000 | -0.347610000 | -0.625611000 |
|                           | 8  | -1.941622000 | 0.579708000  | -0.126483000 |
| CH <sub>3</sub> CFCI(O•)  | 6  | -1.155265000 | 1.160211000  | -0.231399000 |
|                           | 6  | -0.349297000 | -0.086216000 | 0.070526000  |
|                           | 1  | -0.959070000 | 1.449257000  | -1.260595000 |
|                           | 1  | -2.211449000 | 0.925701000  | -0.114726000 |
|                           | 1  | -0.870228000 | 1.959197000  | 0.445998000  |
|                           | 9  | -0.676454000 | -1.066934000 | -0.860908000 |
|                           | 17 | 1.409699000  | 0.169707000  | -0.057804000 |
|                           | 8  | -0.601083000 | -0.507593000 | 1.328175000  |
| TS6                       | 6  | -1.203602000 | 1.308421000  | -0.224805000 |
|                           | 6  | -0.269923000 | -0.323446000 | 0.178288000  |
|                           | 1  | -0.777016000 | 1.513425000  | -1.196534000 |
|                           | 1  | -2.222932000 | 0.953791000  | -0.207316000 |
|                           | 1  | -0.908421000 | 1.956984000  | 0.585828000  |
|                           | 9  | -0.592541000 | -1.001998000 | -0.983608000 |
|                           | 17 | 1.425116000  | 0.205037000  | 0.005457000  |
|                           | 8  | -0.768073000 | -0.600212000 | 1.232105000  |
| CFCIO                     | 6  | 0.000000000  | -0.496037000 | 0.000000000  |
|                           | 9  | -1.337281000 | -0.689390000 | 0.000000000  |
|                           | 17 | 0.334230000  | 1.191539000  | 0.000000000  |
|                           | 8  | 0.794203000  | -1.384429000 | 0.000000000  |
|                           | 6  | 0.000000000  | 0.000000000  | 0.000000000  |

|                                           |     |              |              |              |
|-------------------------------------------|-----|--------------|--------------|--------------|
| •CH <sub>3</sub>                          | 1   | 0.000000000  | 1.075251000  | 0.000000000  |
|                                           | 1   | 0.931195000  | -0.537626000 | 0.000000000  |
|                                           | 1   | -0.931195000 | -0.537626000 | 0.000000000  |
| CH <sub>3</sub> CF(OO•)CH <sub>2</sub> Cl | 6   | 0.259617000  | 1.759764000  | -0.457509000 |
|                                           | 6   | 0.461275000  | 0.350428000  | 0.024059000  |
|                                           | 1   | -0.691827000 | 2.132800000  | -0.089133000 |
|                                           | 1   | 1.067011000  | 2.379905000  | -0.074392000 |
|                                           | 1   | 0.263062000  | 1.786350000  | -1.545634000 |
|                                           | 6   | -0.513393000 | -0.700926000 | -0.470541000 |
|                                           | 1   | -0.244497000 | -1.659279000 | -0.037680000 |
|                                           | 1   | -0.462385000 | -0.750360000 | -1.555740000 |
|                                           | 9   | 0.488065000  | 0.325943000  | 1.406472000  |
|                                           | 17  | -2.180011000 | -0.314048000 | 0.001005000  |
|                                           | 8   | 1.797755000  | -0.011208000 | -0.438817000 |
|                                           | 8   | 2.138652000  | -1.231254000 | -0.054785000 |
| CH <sub>3</sub> CF(O•)CH <sub>2</sub> Cl  | 6   | 1.044003000  | 1.382809000  | -0.350936000 |
|                                           | 6   | 0.821027000  | -0.085812000 | -0.015213000 |
|                                           | 1   | 0.257135000  | 1.963709000  | 0.122383000  |
|                                           | 1   | 2.009112000  | 1.691858000  | 0.043477000  |
|                                           | 1   | 1.020444000  | 1.526907000  | -1.428314000 |
|                                           | 6   | -0.462514000 | -0.708293000 | -0.574134000 |
|                                           | 1   | -0.504932000 | -1.750564000 | -0.267742000 |
|                                           | 1   | -0.443621000 | -0.636662000 | -1.657933000 |
|                                           | 9   | 0.771334000  | -0.201820000 | 1.388886000  |
|                                           | 17  | -1.915265000 | 0.109914000  | 0.026104000  |
|                                           | 8   | 1.858033000  | -0.797453000 | -0.514238000 |
|                                           | TS7 | 6            | 1.012636000  | 1.600991000  |
| 6                                         |     | 0.863844000  | -0.343788000 | -0.036557000 |
| 1                                         |     | 0.110231000  | 1.884752000  | 0.322204000  |
| 1                                         |     | 1.946728000  | 1.750386000  | 0.319064000  |
| 1                                         |     | 1.035263000  | 1.747235000  | -1.269701000 |



|                         |    |              |              |              |
|-------------------------|----|--------------|--------------|--------------|
|                         | 6  | -0.482697000 | -0.647278000 | -0.691553000 |
|                         | 1  | -0.592304000 | -1.727935000 | -0.612283000 |
|                         | 1  | -0.422375000 | -0.364929000 | -1.737664000 |
|                         | 9  | 0.736097000  | -0.377135000 | 1.354384000  |
|                         | 17 | -1.899051000 | 0.110808000  | 0.047663000  |
|                         | 8  | 1.902345000  | -0.679821000 | -0.556634000 |
| CF(O)CH <sub>2</sub> Cl | 6  | 1.007363000  | -0.106176000 | 0.039473000  |
|                         | 6  | -0.283441000 | -0.627422000 | 0.611230000  |
|                         | 1  | -0.342948000 | -0.349880000 | 1.661641000  |
|                         | 1  | -0.294915000 | -1.706472000 | 0.500275000  |
|                         | 9  | 1.068537000  | 1.257206000  | 0.135206000  |
|                         | 17 | -1.685366000 | 0.062599000  | -0.231490000 |
|                         | 8  | 1.916091000  | -0.740137000 | -0.418458000 |
| O <sub>2</sub>          | 8  | 0.000000000  | 0.000000000  | 0.623220000  |
|                         | 8  | 0.000000000  | 0.000000000  | -0.623220000 |
| NO                      | 7  | 0.000000000  | 0.000000000  | -0.609613000 |
|                         | 8  | 0.000000000  | 0.000000000  | 0.533411000  |
| NO <sub>2</sub>         | 7  | 0.000000000  | 0.000000000  | 0.333077000  |
|                         | 8  | 0.000000000  | 1.118348000  | -0.145721000 |
|                         | 8  | 0.000000000  | -1.118348000 | -0.145721000 |

**Table S3:** Vibrational frequencies (in cm<sup>-1</sup>) of all species at MP2/6-31+G (d,p) level of theory.

|                                    |       |      |      |      |      |      |      |      |      |      |
|------------------------------------|-------|------|------|------|------|------|------|------|------|------|
| CH <sub>3</sub> CF=CH <sub>2</sub> | 196   | 390  | 460  | 466  | 749  | 821  | 860  | 965  | 1046 | 1087 |
|                                    | 1297  | 1438 | 1473 | 1513 | 1536 | 1764 | 3128 | 3216 | 3243 | 3268 |
|                                    | 3378  |      |      |      |      |      |      |      |      |      |
| TS1                                | 1656i | 68   | 92   | 385  | 428  | 467  | 495  | 558  | 782  | 899  |
|                                    | 965   | 980  | 989  | 1049 | 1181 | 1250 | 1354 | 1450 | 1507 | 1726 |
|                                    | 3204  | 3279 | 3312 | 3392 |      |      |      |      |      |      |
| TS2a                               | 593i  | 69   | 71   | 215  | 367  | 431  | 489  | 577  | 671  | 766  |
|                                    | 888   | 931  | 1059 | 1084 | 1211 | 1288 | 1451 | 1512 | 1525 | 2033 |

|                                                        |      |      |      |      |      |      |      |      |      |      |
|--------------------------------------------------------|------|------|------|------|------|------|------|------|------|------|
|                                                        | 3135 | 3232 | 3257 | 3390 |      |      |      |      |      |      |
| TS2b                                                   | 520i | 81   | 96   | 199  | 408  | 411  | 449  | 535  | 736  | 785  |
|                                                        | 869  | 911  | 1056 | 1110 | 1194 | 1322 | 1463 | 1518 | 1526 | 2049 |
|                                                        | 3140 | 3232 | 3268 | 3381 |      |      |      |      |      |      |
| IM <sub>add</sub>                                      | 109  | 175  | 189  | 275  | 392  | 472  | 682  | 760  | 866  | 975  |
|                                                        | 1031 | 1052 | 1263 | 1377 | 1433 | 1496 | 1510 | 1547 | 1691 | 3133 |
|                                                        | 3227 |      |      |      |      |      |      |      |      |      |
| TS3                                                    | 457i | 190  | 242  | 286  | 349  | 397  | 481  | 660  | 855  | 890  |
|                                                        | 993  | 1043 | 1077 | 1341 | 1424 | 1479 | 1509 | 1524 | 1606 | 3137 |
|                                                        | 3240 | 3275 | 3286 | 3414 |      |      |      |      |      |      |
| TS4                                                    | 298i | 107  | 143  | 177  | 400  | 482  | 493  | 860  | 890  | 979  |
|                                                        | 998  | 1051 | 1080 | 1349 | 1437 | 1473 | 1504 | 1522 | 1724 | 3133 |
|                                                        | 3223 | 3267 | 3284 | 3401 |      |      |      |      |      |      |
| P1                                                     | 413  | 480  | 510  | 575  | 646  | 740  | 747  | 913  | 971  | 1060 |
|                                                        | 1241 | 1389 | 1509 | 1570 | 3278 | 3285 | 3401 | 3403 |      |      |
| P2                                                     | 215  | 392  | 442  | 532  | 786  | 804  | 905  | 1049 | 1094 | 1196 |
|                                                        | 1428 | 1492 | 1502 | 1976 | 3091 | 3175 | 3209 | 3373 |      |      |
| P3                                                     | 217  | 276  | 289  | 320  | 391  | 414  | 471  | 594  | 669  | 866  |
|                                                        | 963  | 1005 | 1125 | 1250 | 1314 | 1456 | 1502 | 1529 | 1530 |      |
| P4                                                     | 94   | 156  | 193  | 359  | 423  | 533  | 688  | 810  | 928  | 1013 |
|                                                        | 1065 | 1173 | 1314 | 1346 | 1374 | 1461 | 1506 | 1515 | 1531 | 3100 |
|                                                        | 3184 |      |      |      |      |      |      |      |      |      |
| HCl                                                    | 3112 |      |      |      |      |      |      |      |      |      |
| CH <sub>3</sub> CFCICH <sub>2</sub> (OO <sup>•</sup> ) | 21   | 123  | 164  | 267  | 306  | 318  | 373  | 419  | 426  | 525  |
|                                                        | 753  | 886  | 964  | 1008 | 1015 | 1154 | 1182 | 1248 | 1279 | 1315 |
|                                                        | 1418 | 1459 | 1518 | 1529 |      |      |      |      |      |      |
| CH <sub>3</sub> CFCICH <sub>2</sub> (O <sup>•</sup> )  | 136  | 225  | 273  | 314  | 341  | 393  | 430  | 484  | 716  | 875  |
|                                                        | 980  | 1020 | 1088 | 1151 | 1244 | 1296 | 1353 | 1460 | 1498 | 1526 |
|                                                        | 1533 | 1562 | 3112 | 3140 |      |      |      |      |      |      |

|                                           |      |      |      |      |      |      |      |      |      |      |
|-------------------------------------------|------|------|------|------|------|------|------|------|------|------|
| TS5                                       | 739i | 116  | 182  | 226  | 258  | 306  | 355  | 414  | 428  | 659  |
|                                           | 726  | 969  | 1023 | 1175 | 1221 | 1250 | 1282 | 1447 | 1510 | 1514 |
|                                           | 1535 | 1667 | 2994 | 3085 |      |      |      |      |      |      |
| CH <sub>3</sub> CFCI                      | 213  | 330  | 403  | 437  | 698  | 967  | 1087 | 1188 | 1246 | 1456 |
|                                           | 1516 | 1522 | 3109 | 3212 | 3255 |      |      |      |      |      |
| HCHO                                      | 1211 | 1282 | 1570 | 1760 | 3040 | 3123 |      |      |      |      |
| CH <sub>3</sub> CFCI(OO•)                 | 130  | 244  | 258  | 313  | 379  | 420  | 444  | 628  | 691  | 874  |
|                                           | 955  | 1129 | 1181 | 1205 | 1263 | 1462 | 1523 | 1525 | 3149 | 3258 |
|                                           | 3267 |      |      |      |      |      |      |      |      |      |
| CH <sub>3</sub> CFCI(O)                   | 228  | 256  | 298  | 413  | 432  | 523  | 685  | 896  | 960  | 1113 |
|                                           | 1170 | 1244 | 1444 | 1522 | 1527 | 3148 | 3256 | 3275 |      |      |
| TS6                                       | 692i | 206  | 241  | 277  | 406  | 461  | 560  | 687  | 762  | 783  |
|                                           | 980  | 1174 | 1475 | 1490 | 1740 | 3190 | 3375 | 3387 |      |      |
| CFCIO                                     | 417  | 508  | 663  | 765  | 1087 | 1885 |      |      |      |      |
| •CH <sub>3</sub>                          | 471  | 1479 | 1479 | 3230 | 3428 | 3428 |      |      |      |      |
| CH <sub>3</sub> CF(OO•)CH <sub>2</sub> Cl | 94   | 130  | 189  | 225  | 269  | 338  | 385  | 415  | 509  | 634  |
|                                           | 775  | 855  | 892  | 942  | 1003 | 1140 | 1169 | 1219 | 1292 | 1356 |
|                                           | 1384 | 1465 | 1511 | 1530 |      |      |      |      |      |      |
| CH <sub>3</sub> CF(O•)CH <sub>2</sub> Cl  | 106  | 202  | 235  | 307  | 330  | 434  | 479  | 567  | 761  | 844  |
|                                           | 911  | 967  | 980  | 1119 | 1200 | 1231 | 1295 | 1377 | 1436 | 1508 |
|                                           | 1528 | 1534 | 3147 | 3180 |      |      |      |      |      |      |
| TS7                                       | 683i | 104  | 184  | 203  | 270  | 277  | 425  | 507  | 589  | 695  |
|                                           | 742  | 770  | 851  | 940  | 1107 | 1159 | 1241 | 1350 | 1474 | 1485 |
|                                           | 1500 | 1772 | 3175 | 3190 |      |      |      |      |      |      |
| CF(O)CH <sub>2</sub> Cl                   | 58   | 205  | 406  | 557  | 669  | 823  | 860  | 980  | 1170 | 1278 |
|                                           | 1366 | 1509 | 1880 | 3180 | 3269 |      |      |      |      |      |
| O <sub>2</sub>                            | 1410 |      |      |      |      |      |      |      |      |      |
| NO                                        | 3854 |      |      |      |      |      |      |      |      |      |
| NO <sub>2</sub>                           | 752  | 1370 | 2307 |      |      |      |      |      |      |      |

**Table S4:** The Zero-point corrected Total energy ( $E_0$ ), Enthalpy (H) and Gibbs free energy (G) of all species at MP2/6-31+G(d,p) level of theory. All values are in Hartree.

| Species                                                  | $E_0$        | H           | G           |
|----------------------------------------------------------|--------------|-------------|-------------|
| CH <sub>3</sub> CF(Cl)CH <sub>2</sub> (OO <sup>•</sup> ) | -826.0355788 | -826.021829 | -826.065055 |
| CH <sub>3</sub> CF(Cl)CH <sub>2</sub> O <sup>•</sup>     | -751.0597881 | -751.047596 | -751.086113 |
| TS5                                                      | -751.0314715 | -751.019099 | -751.058683 |
| CH <sub>3</sub> C <sup>•</sup> FCI                       | -636.8878474 | -636.879563 | -636.913443 |
| HCHO                                                     | -114.1669317 | -114.161511 | -114.186998 |
| CH <sub>3</sub> CFCl(OO <sup>•</sup> )                   | -786.8818208 | -786.871387 | -786.909523 |
| CH <sub>3</sub> CFCl(O <sup>•</sup> )                    | -711.9170101 | -711.907733 | -711.943498 |
| TS6                                                      | -711.8915039 | -711.882275 | -711.918335 |
| CFCl(O)                                                  | -672.2567218 | -672.251472 | -672.282894 |
| NO                                                       | -129.5586345 | -129.554812 | -129.578096 |
| NO <sub>2</sub>                                          | -204.5650909 | -204.560617 | -204.587915 |
| O <sub>2</sub>                                           | -149.9544284 | -149.950927 | -149.974267 |
| CH <sub>3</sub> CF(OO <sup>•</sup> )CH <sub>2</sub> Cl   | -826.0415878 | -826.028058 | -826.06966  |
| CH <sub>3</sub> CF(O <sup>•</sup> )CH <sub>2</sub> Cl    | -751.0762481 | -751.06404  | -751.102893 |
| TS7                                                      | -751.0508943 | -751.038598 | -751.078079 |
| CF(O)CH <sub>2</sub> Cl                                  | -711.412285  | -711.403856 | -711.439472 |
| <sup>•</sup> CH <sub>3</sub>                             | -39.6673649  | -39.661515  | -39.683653  |
